# Supplementary material for: Hydrophobic cavity-directed azide-acetyllysine photochemistry for profiling non-histone interacting partners of bromodomain protein 1
Source: Royal Society of Chemistry journal article supplement (doi:10.1039/d2cb00043a), 2022-01-01
Supplement: d2cb00043a2.xlsx [file d2cb00043a2.xlsx]

## Sheet: BRD1-R585AzF_quantitative value
			UNIQUE PEPTIDE COUNTS			UNIQUE PEPTIDE COUNTS				NORMALIZED TOTAL SPECTRA			NORMALIZED TOTAL SPECTRA			FOLD ENRICHMENT	p-Value
			NO LIGHT			LIGHT				NO LIGHT			LIGHT			(+UV/-UV)
Identified Proteins (342)	Accession Number	Mol. Wt.	1st set	2nd set	Avg (No Light)	1st set	2nd set	Avg (Light)		1st set	2nd set	Avg (No Light)	1st set	2nd set	Avg (Light)
BRD1_HUMAN Isoform 2 of Bromodomain-containing protein 1 OS=Homo sapiens GN=BRD1	O95696-2	133 kDa	38	44	41	52	48	50		182.371	178.754	180.562	187.865	203.984	195.925	1.08508	0.203999		Non-confident proteins based o the selected criteria
K2C1_HUMAN Keratin, type II cytoskeletal 1 OS=Homo sapiens GN=KRT1 PE=1 SV=6	P04264	66 kDa	88	94	91	65	79	72		192.566	212.335	202.45	92.106	97.6309	94.8684	0.468601	0.00897865		Proteins present in both treatment group with >2 average peptides,* p< 0.05
K22E_HUMAN Keratin, type II cytoskeletal 2 epidermal OS=Homo sapiens GN=KRT2 PE=1 SV=2	P35908	65 kDa	86	78	82	57	66	61.5		149.736	135.086	142.411	59.9447	71.5523	65.7485	0.461681	0.0145377		Protein present in UV only and with >2 average peptides,* p< 0.05
K1C10_HUMAN Keratin, type I cytoskeletal 10 OS=Homo sapiens GN=KRT10 PE=1 SV=6	P13645	59 kDa	69	63	66	42	54	48		120.742	106.386	113.564	49.1375	56.5096	52.8236	0.465143	0.0171942		Proteins present in non-UV only and with >2 average peptides,* p< 0.05
KPYM_HUMAN Pyruvate kinase PKM OS=Homo sapiens GN=PKM PE=1 SV=4	P14618	58 kDa	31	34	32.5	44	52	48		46.4598	42.3038	44.3818	48.1309	45.2683	46.6996	1.05222	0.45529		* If a protein has less than 2 average peptides, it is considered not present in that particular treatment
K1C9_HUMAN Keratin, type I cytoskeletal 9 OS=Homo sapiens GN=KRT9 PE=1 SV=3	P35527	62 kDa	52	42	47	39	39	39		98.7648	84.4958	91.6303	43.3606	38.6305	40.9955	0.447402	0.0213323
SAHH_HUMAN Adenosylhomocysteinase OS=Homo sapiens GN=AHCY PE=1 SV=4	P23526	48 kDa	28	26	27	25	26	25.5		48.1948	39.1536	43.6742	28.5027	23.2552	25.8789	0.592545	0.0765034
TPR_HUMAN Nucleoprotein TPR OS=Homo sapiens GN=TPR PE=1 SV=3	P12270	267 kDa	30	35	32.5	32	43	37.5		35.9188	44.9286	40.4237	30.7462	26.7936	28.7699	0.711709	0.141362
TERA_HUMAN Transitional endoplasmic reticulum ATPase OS=Homo sapiens GN=VCP PE=1 SV=4	P55072	89 kDa	19	20	19.5	22	31	26.5		35.2704	48.5272	41.8988	30.4004	32.1019	31.2511	0.745872	0.252113
LDHB_HUMAN L-lactate dehydrogenase B chain OS=Homo sapiens GN=LDHB PE=1 SV=2	P07195	37 kDa	13	13	13	27	38	32.5		18.7195	19.5245	19.122	32.5686	38.257	35.4128	1.85194	0.0297131
H2B2F_HUMAN Isoform 2 of Histone H2B type 2-F OS=Homo sapiens GN=HIST2H2BF	Q5QNW6-2	15 kDa	14	16	15	12	14	13		66.7046	70.8109	68.7578	53.4071	46.2827	49.8449	0.724935	0.0441536
H4_HUMAN Histone H4 OS=Homo sapiens GN=HIST1H4A PE=1 SV=2	P62805	11 kDa	15	20	17.5	18	20	19		39.5529	44.6892	42.121	41.6402	37.3662	39.5032	0.937849	0.515358
LDHA_HUMAN L-lactate dehydrogenase A chain OS=Homo sapiens GN=LDHA PE=1 SV=2	P00338	37 kDa	8	8	8	23	26	24.5		15.096	15.4268	15.2614	30.6504	33.5241	32.0872	2.10251	0.0073081
PYGL_HUMAN Glycogen phosphorylase, liver form OS=Homo sapiens GN=PYGL PE=1 SV=4	P06737	97 kDa	16	13	14.5	20	21	20.5		23.781	27.598	25.6895	23.202	21.308	22.255	0.866307	0.248275
PRDX4_HUMAN Peroxiredoxin-4 OS=Homo sapiens GN=PRDX4 PE=1 SV=1	Q13162	31 kDa	11	11	11	17	23	20		24.931	31.538	28.2345	22.7885	24.4517	23.6201	0.836569	0.308288
H2A2A_HUMAN Histone H2A type 2-A OS=Homo sapiens GN=HIST2H2AA3 PE=1 SV=3	Q6FI13	14 kDa	11	14	12.5	16	18	17		34.9839	40.4948	37.7394	42.8003	39.4253	41.1128	1.08939	0.406066
NDKB_HUMAN Isoform 3 of Nucleoside diphosphate kinase B OS=Homo sapiens GN=NME2	P22392-2	30 kDa	13	11	12	17	17	17		54.872	43.3746	49.1233	55.9052	61.6718	58.7885	1.19675	0.271744
TPIS_HUMAN Isoform 2 of Triosephosphate isomerase OS=Homo sapiens GN=TPI1	P60174-1	27 kDa	5	7	6	20	28	24		8.799	14.192	11.4955	26.9016	26.8159	26.8588	2.33646	0.0294589
DHE3_HUMAN Glutamate dehydrogenase 1, mitochondrial OS=Homo sapiens GN=GLUD1 PE=1 SV=2	P00367	61 kDa	14	17	15.5	10	21	15.5		17.6453	15.919	16.7822	8.24815	11.7275	9.98781	0.595145	0.0728793
E9PH29_HUMAN Thioredoxin-dependent peroxide reductase, mitochondrial OS=Homo sapiens GN=PRDX3 PE=2 SV=1	E9PH29 (+1)	26 kDa	9	11	10	9	14	11.5		25.1754	31.4865	28.331	19.3971	28.1358	23.7664	0.838886	0.486233
TKT_HUMAN Transketolase OS=Homo sapiens GN=TKT PE=1 SV=3	P29401 (+1)	68 kDa	11	12	11.5	16	21	18.5		12.886	9.6273	11.2567	15.1005	13.0442	14.0723	1.25013	0.281371
FLNA_HUMAN Filamin-A OS=Homo sapiens GN=FLNA PE=1 SV=4	P21333 (+2)	281 kDa	6	9	7.5	25	23	24		7.5263	15.3346	11.4305	25.9384	18.0176	21.978	1.92276	0.198328
PDIA4_HUMAN Protein disulfide-isomerase A4 OS=Homo sapiens GN=PDIA4 PE=1 SV=2	P13667	73 kDa	3	1	2	24	31	27.5		3.5627	0.7236	2.14315	23.9212	23.3071	23.6142	11.0184	0.0045445
LMNA_HUMAN Isoform 6 of Prelamin-A/C OS=Homo sapiens GN=LMNA	P02545-6	69 kDa	14	18	16	18	20	19		14.4372	14.6304	14.5338	14.8962	11.2022	13.0492	0.897852	0.50638
K1C14_HUMAN Keratin, type I cytoskeletal 14 OS=Homo sapiens GN=KRT14 PE=1 SV=4	P02533	52 kDa	22	19	20.5	12	16	14		43.8077	31.8676	37.8376	21.4991	14.4417	17.9704	0.474934	0.103307
EF2_HUMAN Elongation factor 2 OS=Homo sapiens GN=EEF2 PE=1 SV=4	P13639	95 kDa	8	6	7	19	23	21		10.569	12.987	11.778	20.8435	17.5867	19.2151	1.63144	0.0669837
PUR6_HUMAN Multifunctional protein ADE2 OS=Homo sapiens GN=PAICS PE=1 SV=3	P22234	47 kDa	4	7	5.5	19	22	20.5		5.7797	7.8743	6.827	21.0534	20.1089	20.5811	3.01467	0.00690479
CAH2_HUMAN Carbonic anhydrase 2 OS=Homo sapiens GN=CA2 PE=1 SV=2	P00918	29 kDa	11	7	9	13	14	13.5		19.3669	15.769	17.5679	22.0153	17.21	19.6127	1.11639	0.566024
PUR8_HUMAN Adenylosuccinate lyase OS=Homo sapiens GN=ADSL PE=1 SV=2	P30566	55 kDa	10	15	12.5	12	13	12.5		12.2806	15.1333	13.7069	10.9838	7.77809	9.38096	0.684395	0.181317
AATM_HUMAN Aspartate aminotransferase, mitochondrial OS=Homo sapiens GN=GOT2 PE=1 SV=3	P00505	48 kDa	12	9	10.5	12	17	14.5		15.8588	12.0526	13.9557	11.2043	13.6282	12.4162	0.88969	0.565466
GLYM_HUMAN Isoform 3 of Serine hydroxymethyltransferase, mitochondrial OS=Homo sapiens GN=SHMT2	P34897-3	53 kDa	12	10	11	10	14	12		12.4389	11.578	12.0084	7.9294	8.97551	8.45246	0.703876	0.0344257
TPM3_HUMAN Isoform 2 of Tropomyosin alpha-3 chain OS=Homo sapiens GN=TPM3	P06753-2	29 kDa	0	0	0	23	31	27		0	0	0	23.7243	24.1505	23.9374	#DIV/0!	7.92431e-05
PDIA1_HUMAN Protein disulfide-isomerase OS=Homo sapiens GN=P4HB PE=1 SV=3	P07237	57 kDa	2	5	3.5	14	29	21.5		1.8408	3.618	2.7294	11.6161	15.73	13.673	5.00954	0.0394568
CGL_HUMAN Cystathionine gamma-lyase OS=Homo sapiens GN=CTH PE=1 SV=3	P32929	45 kDa	10	8	9	13	13	13		12.94	12.273	12.6065	12.2131	13.5914	12.9022	1.02346	0.736534
ANM5_HUMAN Protein arginine N-methyltransferase 5 OS=Homo sapiens GN=PRMT5 PE=1 SV=4	O14744	73 kDa	8	12	10	13	14	13.5		8.2836	12.6537	10.4687	11.499	8.7352	10.1171	0.966419	0.904291
G6PI_HUMAN Glucose-6-phosphate isomerase OS=Homo sapiens GN=GPI PE=1 SV=4	P06744	63 kDa	8	11	9.5	10	11	10.5		10.2823	9.6273	9.9548	7.65139	6.8944	7.2729	0.730592	0.0331094
VINC_HUMAN Vinculin OS=Homo sapiens GN=VCL PE=1 SV=4	P18206 (+1)	124 kDa	0	0	0	22	24	23		0	0	0	22.31	16.921	19.6155	#DIV/0!	0.0183516
SF3B3_HUMAN Splicing factor 3B subunit 3 OS=Homo sapiens GN=SF3B3 PE=1 SV=4	Q15393	136 kDa	12	9	10.5	14	13	13.5		15.0528	12.8112	13.932	11.9379	9.6357	10.7868	0.774246	0.18939
E9PBJ5_HUMAN Succinate dehydrogenase [ubiquinone] flavoprotein subunit, mitochondrial OS=Homo sapiens GN=SDHA PE=2 SV=1	E9PBJ5 (+1)	67 kDa	5	10	7.5	10	13	11.5		5.5224	8.9037	7.21305	10.2523	8.36559	9.30892	1.29057	0.392157
MAOM_HUMAN NAD-dependent malic enzyme, mitochondrial OS=Homo sapiens GN=ME2 PE=1 SV=1	P23368	65 kDa	10	13	11.5	11	10	10.5		11.045	9.4068	10.2259	7.3735	4.7399	6.0567	0.59229	0.114977
HSP74_HUMAN Heat shock 70 kDa protein 4 OS=Homo sapiens GN=HSPA4 PE=1 SV=4	P34932	94 kDa	6	3	4.5	15	15	15		7.927	6.4937	7.21035	14.0005	11.907	12.9537	1.79655	0.0454822
SF3B2_HUMAN Splicing factor 3B subunit 2 OS=Homo sapiens GN=SF3B2 PE=1 SV=2	Q13435	100 kDa	8	7	7.5	12	12	12		9.7678	7.9387	8.85325	10.9244	9.09066	10.0075	1.13038	0.466802
1433E_HUMAN 14-3-3 protein epsilon OS=Homo sapiens GN=YWHAE PE=1 SV=1	P62258	29 kDa	5	4	4.5	9	14	11.5		6.5561	7.8844	7.22025	13.0037	15.6838	14.3437	1.9866	0.0413661
SODM_HUMAN Superoxide dismutase [Mn], mitochondrial OS=Homo sapiens GN=SOD2 PE=1 SV=2	P04179	25 kDa	5	7	6	9	7	8		10.266	18.923	14.5945	12.3197	8.71179	10.5157	0.720528	0.47612
K2C5_HUMAN Keratin, type II cytoskeletal 5 OS=Homo sapiens GN=KRT5 PE=1 SV=3	P13647	62 kDa	15	11	13	6	7	6.5		48.3175	35.8831	42.1003	17.2167	11.7631	14.4899	0.344176	0.0554748
HMCS1_HUMAN Hydroxymethylglutaryl-CoA synthase, cytoplasmic OS=Homo sapiens GN=HMGCS1 PE=1 SV=2	Q01581	57 kDa	8	7	7.5	8	11	9.5		7.3632	5.7888	6.576	6.1446	5.36661	5.7556	0.875244	0.448772
DLDH_HUMAN Dihydrolipoyl dehydrogenase, mitochondrial OS=Homo sapiens GN=DLD PE=1 SV=2	P09622	54 kDa	7	7	7	9	11	10		6.6007	5.7888	6.19475	7.3149	5.232	6.27345	1.0127	0.950276
HXK1_HUMAN Hexokinase-1 OS=Homo sapiens GN=HK1 PE=1 SV=3	P19367	102 kDa	4	7	5.5	9	13	11		5.2847	10.4642	7.87445	8.9239	9.4006	9.16225	1.16354	0.66953
ATPA_HUMAN ATP synthase subunit alpha, mitochondrial OS=Homo sapiens GN=ATP5A1 PE=1 SV=1	P25705	60 kDa	6	10	8	10	10	10		5.5224	7.236	6.3792	6.1446	4.309	5.2268	0.81935	0.4556
THIL_HUMAN Acetyl-CoA acetyltransferase, mitochondrial OS=Homo sapiens GN=ACAT1 PE=1 SV=1	P24752	45 kDa	6	4	5	7	12	9.5		6.4699	4.7205	5.5952	6.2167	8.8338	7.52525	1.34495	0.344895
KCRU_HUMAN Creatine kinase U-type, mitochondrial OS=Homo sapiens GN=CKMT1A PE=1 SV=1	P12532	47 kDa	6	7	6.5	7	6	6.5		8.6265	9.441	9.03375	7.8719	5.0903	6.4811	0.717432	0.220229
K7ELL7_HUMAN Glucosidase 2 subunit beta OS=Homo sapiens GN=PRKCSH PE=2 SV=1	K7ELL7 (+2)	60 kDa	0	2	1	15	11	13		0	1.4472	0.7236	12.6646	9.3759	11.0202	15.2298	0.0291188
B4DQJ8_HUMAN 6-phosphogluconate dehydrogenase, decarboxylating OS=Homo sapiens GN=PGD PE=2 SV=1	B4DQJ8	52 kDa	4	6	5	10	10	10		3.9974	5.0031	4.50025	7.7057	7.2448	7.47525	1.66107	0.0328747
GRP78_HUMAN 78 kDa glucose-regulated protein OS=Homo sapiens GN=HSPA5 PE=1 SV=2	P11021	72 kDa	4	5	4.5	9	14	11.5		3.6816	3.618	3.6498	6.3639	6.62	6.49195	1.77871	0.0021481
MDHM_HUMAN Malate dehydrogenase, mitochondrial OS=Homo sapiens GN=MDH2 PE=1 SV=3	P40926	36 kDa	6	6	6	8	8	8		8.6265	6.6087	7.6176	6.73706	6.2484	6.49273	0.852333	0.391783
RTCB_HUMAN tRNA-splicing ligase RtcB homolog OS=Homo sapiens GN=RTCB PE=1 SV=1	Q9Y3I0	55 kDa	7	8	7.5	9	7	8		6.4428	5.7888	6.1158	6.42249	3.0163	4.7194	0.771673	0.505209
ATPB_HUMAN ATP synthase subunit beta, mitochondrial OS=Homo sapiens GN=ATP5B PE=1 SV=3	P06576	57 kDa	6	9	7.5	6	11	8.5		5.5224	6.5124	6.0174	3.6867	4.7399	4.2133	0.700186	0.129929
SYTC_HUMAN Threonine--tRNA ligase, cytoplasmic OS=Homo sapiens GN=TARS PE=1 SV=3	P26639	83 kDa	7	5	6	6	12	9		6.4428	3.618	5.0304	4.7985	6.7766	5.78755	1.15051	0.703465
ALDH2_HUMAN Aldehyde dehydrogenase, mitochondrial OS=Homo sapiens GN=ALDH2 PE=1 SV=2	P05091	56 kDa	2	3	2.5	9	13	11		1.8408	2.1708	2.0058	6.1446	6.75979	6.45219	3.21677	0.00610633
H0Y6K2_HUMAN Bromodomain-containing protein 2 (Fragment) OS=Homo sapiens GN=BRD2 PE=4 SV=1	H0Y6K2	88 kDa	5	6	5.5	6	5	5.5		11.1614	16.853	14.0072	10.5475	6.95329	8.75038	0.624706	0.258722
PREP_HUMAN Presequence protease, mitochondrial OS=Homo sapiens GN=PITRM1 PE=1 SV=3	Q5JRX3 (+1)	117 kDa	5	9	7	5	7	6		6.6059	14.611	10.6085	5.3544	5.6404	5.4974	0.51821	0.330067
U5S1_HUMAN 116 kDa U5 small nuclear ribonucleoprotein component OS=Homo sapiens GN=EFTUD2 PE=1 SV=1	Q15029 (+1)	109 kDa	7	1	4	8	11	9.5		9.2482	1.6234	5.4358	7.1391	8.1472	7.64315	1.40608	0.623919
PGAM1_HUMAN Phosphoglycerate mutase 1 OS=Homo sapiens GN=PGAM1 PE=1 SV=2	P18669	29 kDa	4	3	3.5	7	11	9		5.866	7.8844	6.8752	7.0345	9.0714	8.05295	1.1713	0.497739
K2C6A_HUMAN Keratin, type II cytoskeletal 6A OS=Homo sapiens GN=KRT6A PE=1 SV=3	P02538	60 kDa	13	6	9.5	5	3	4		40.7615	16.9076	28.8346	10.378	10.2987	10.3384	0.35854	0.261107
THOP1_HUMAN Thimet oligopeptidase OS=Homo sapiens GN=THOP1 PE=1 SV=2	P52888	79 kDa	4	8	6	8	6	7		4.602	5.7888	5.1954	6.5833	3.1728	4.87805	0.938917	0.876665
PGK1_HUMAN Phosphoglycerate kinase 1 OS=Homo sapiens GN=PGK1 PE=1 SV=3	P00558	45 kDa	3	1	2	9	14	11.5		3.2349	0.9441	2.0895	6.8311	8.1066	7.46885	3.57447	0.0545759
PUR4_HUMAN Phosphoribosylformylglycinamidine synthase OS=Homo sapiens GN=PFAS PE=1 SV=4	O15067	145 kDa	3	2	2.5	9	9	9		3.9635	4.8703	4.4169	9.8163	6.2671	8.0417	1.82067	0.186387
HEM6_HUMAN Coproporphyrinogen-III oxidase, mitochondrial OS=Homo sapiens GN=CPOX PE=1 SV=3	P36551	50 kDa	4	5	4.5	7	10	8.5		4.3132	4.7205	4.51685	5.0818	6.0867	5.58425	1.23632	0.187814
A2A274_HUMAN Aconitate hydratase, mitochondrial OS=Homo sapiens GN=ACO2 PE=2 SV=1	A2A274 (+1)	88 kDa	3	3	3	7	10	8.5		2.7612	2.1708	2.466	6.5833	6.3457	6.4645	2.62145	0.00627374
TLN1_HUMAN Talin-1 OS=Homo sapiens GN=TLN1 PE=1 SV=3	Q9Y490	270 kDa	1	1	1	9	14	11.5		1.3212	0.7236	1.0224	7.4757	8.8132	8.14445	7.96601	0.0104122
PYGB_HUMAN Glycogen phosphorylase, brain form OS=Homo sapiens GN=PYGB PE=1 SV=5	P11216	97 kDa	5	3	4	7	9	8		9.2482	11.364	10.3061	11.601	8.1472	9.8741	0.958083	0.850851
AL1B1_HUMAN Aldehyde dehydrogenase X, mitochondrial OS=Homo sapiens GN=ALDH1B1 PE=1 SV=3	P30837	57 kDa	6	3	4.5	7	9	8		5.5224	2.1708	3.8466	4.3012	4.309	4.3051	1.1192	0.810058
PUR1_HUMAN Amidophosphoribosyltransferase OS=Homo sapiens GN=PPAT PE=1 SV=1	Q06203	57 kDa	2	6	4	7	8	7.5		1.8408	4.3416	3.0912	4.9156	4.309	4.6123	1.49207	0.358632
H32_HUMAN Histone H3.2 OS=Homo sapiens GN=HIST2H3A PE=1 SV=3	Q71DI3	15 kDa	4	3	3.5	5	4	4.5		13.1769	8.4663	10.8216	10.0988	12.3089	11.2038	1.03532	0.896674
ACTG_HUMAN Actin, cytoplasmic 2 OS=Homo sapiens GN=ACTG1 PE=1 SV=1	P63261	42 kDa	3	7	5	8	6	7		3.2349	7.2415	5.2382	6.4768	3.54556	5.01118	0.956661	0.935463
COF1_HUMAN Cofilin-1 OS=Homo sapiens GN=CFL1 PE=1 SV=3	P23528	19 kDa	0	2	1	10	10	10		0	3.1538	1.5769	11.217	7.7629	9.48995	6.01811	0.0773482
ILF2_HUMAN Interleukin enhancer-binding factor 2 OS=Homo sapiens GN=ILF2 PE=1 SV=2	Q12905	43 kDa	4	6	5	6	4	5		4.3132	7.5528	5.933	4.7275	3.7706	4.24905	0.716172	0.423799
1433Z_HUMAN 14-3-3 protein zeta/delta OS=Homo sapiens GN=YWHAZ PE=1 SV=1	P63104	28 kDa	1	1	1	9	10	9.5		4.3995	6.3075	5.3535	11.673	14.6005	13.1367	2.45386	0.0468768
G3P_HUMAN Glyceraldehyde-3-phosphate dehydrogenase OS=Homo sapiens GN=GAPDH PE=1 SV=3	P04406	36 kDa	4	4	4	5	5	5		5.3915	6.6087	6.0001	5.2479	4.3631	4.8055	0.800903	0.253272
ILF3_HUMAN Isoform 4 of Interleukin enhancer-binding factor 3 OS=Homo sapiens GN=ILF3	Q12906-4 (+2)	76 kDa	3	3	3	7	10	8.5		2.7612	2.1708	2.466	4.8571	4.99689	4.92699	1.99797	0.0148572
GLNA_HUMAN Glutamine synthetase OS=Homo sapiens GN=GLUL PE=1 SV=4	P15104	42 kDa	5	6	5.5	5	6	5.5		5.3915	6.6087	6.0001	4.3733	4.3631	4.3682	0.728021	0.11549
ECHM_HUMAN Enoyl-CoA hydratase, mitochondrial OS=Homo sapiens GN=ECHS1 PE=1 SV=4	P30084	31 kDa	0	0	0	8	11	9.5		0	0	0	11.4451	9.2965	10.3708	#DIV/0!	0.010561
PRDX1_HUMAN Peroxiredoxin-1 OS=Homo sapiens GN=PRDX1 PE=1 SV=1	Q06830	22 kDa	3	2	2.5	8	7	7.5		10.266	12.615	11.4405	18.1173	10.9567	14.537	1.27066	0.497578
GSHR_HUMAN Glutathione reductase, mitochondrial OS=Homo sapiens GN=GSR PE=1 SV=2	P00390	56 kDa	3	4	3.5	5	6	5.5		3.6816	2.8944	3.288	3.0723	4.07391	3.5731	1.08671	0.698253
STIP1_HUMAN Stress-induced-phosphoprotein 1 OS=Homo sapiens GN=STIP1 PE=1 SV=1	P31948	63 kDa	0	0	0	8	12	10		0	0	0	6.06824	5.6017	5.83497	#DIV/0!	0.00159441
FUBP2_HUMAN Far upstream element-binding protein 2 OS=Homo sapiens GN=KHSRP PE=1 SV=4	Q92945	73 kDa	0	1	0.5	7	13	10		0	0.7236	0.3618	5.11725	7.44556	6.28141	17.3615	0.0398906
RBBP4_HUMAN Histone-binding protein RBBP4 OS=Homo sapiens GN=RBBP4 PE=1 SV=3	Q09028 (+1)	48 kDa	5	7	6	2	7	4.5		4.7599	5.5062	5.13305	1.2289	3.0163	2.1226	0.413516	0.089775
MCCB_HUMAN Methylcrotonoyl-CoA carboxylase beta chain, mitochondrial OS=Homo sapiens GN=MCCC2 PE=1 SV=1	Q9HCC0	61 kDa	4	4	4	6	7	6.5		4.0824	2.8944	3.4884	3.6867	3.0163	3.3515	0.960756	0.859479
HPRT_HUMAN Hypoxanthine-guanine phosphoribosyltransferase OS=Homo sapiens GN=HPRT1 PE=1 SV=2	P00492	25 kDa	0	0	0	12	8	10		0	0	0	12.0917	6.9723	9.532	#DIV/0!	0.0651449
BRD4_HUMAN Bromodomain-containing protein 4 OS=Homo sapiens GN=BRD4 PE=1 SV=2	O60885	152 kDa	3	9	6	3	5	4		3.3199	14.1045	8.7122	3.9601	4.7297	4.3449	0.498714	0.503982
AMOT_HUMAN Angiomotin OS=Homo sapiens GN=AMOT PE=1 SV=1	Q4VCS5	118 kDa	5	4	4.5	5	6	5.5		6.4108	4.1887	5.29975	4.8293	4.5057	4.6675	0.880702	0.630065
RNZ2_HUMAN Zinc phosphodiesterase ELAC protein 2 OS=Homo sapiens GN=ELAC2 PE=1 SV=2	Q9BQ52	92 kDa	4	2	3	6	8	7		4.8839	2.3005	3.5922	5.0087	5.1613	5.085	1.41557	0.367882
B4DJV2_HUMAN Citrate synthase OS=Homo sapiens GN=CS PE=2 SV=1	B4DJV2	50 kDa	1	2	1.5	7	9	8		1.0783	1.8882	1.48325	5.6022	6.383	5.9926	4.04018	0.0152058
RRBP1_HUMAN Isoform 1 of Ribosome-binding protein 1 OS=Homo sapiens GN=RRBP1	Q9P2E9-2	152 kDa	0	0	0	7	13	10		0	0	0	5.95111	7.364	6.65756	#DIV/0!	0.011073
ACTN4_HUMAN Alpha-actinin-4 OS=Homo sapiens GN=ACTN4 PE=1 SV=2	O43707	105 kDa	6	5	5.5	2	6	4		7.6842	7.4378	7.561	1.50685	3.66489	2.58587	0.342001	0.0444951
METK2_HUMAN S-adenosylmethionine synthase isoform type-2 OS=Homo sapiens GN=MAT2A PE=1 SV=1	P31153	44 kDa	4	3	3.5	5	5	5		5.3915	2.8323	4.1119	4.11306	3.7706	3.94183	0.95864	0.907251
SYG_HUMAN Glycine--tRNA ligase OS=Homo sapiens GN=GARS PE=1 SV=3	P41250	83 kDa	2	4	3	3	9	6		1.8408	3.618	2.7294	2.12129	4.6613	3.3913	1.24251	0.710937
ALBU_HUMAN Serum albumin OS=Homo sapiens GN=ALB PE=1 SV=2	P02768	69 kDa	2	0	1	4	7	5.5		1.8408	0	0.9204	4.8571	5.38849	5.12279	5.56584	0.0482371
THIC_HUMAN Acetyl-CoA acetyltransferase, cytosolic OS=Homo sapiens GN=ACAT2 PE=1 SV=2	Q9BWD1	41 kDa	1	2	1.5	6	7	6.5		1.0783	1.8882	1.48325	5.342	4.767	5.0545	3.40772	0.0187951
EZRI_HUMAN Ezrin OS=Homo sapiens GN=EZR PE=1 SV=4	P15311	69 kDa	0	0	0	6	10	8		0	0	0	5.413	6.5415	5.97725	#DIV/0!	0.00879391
SPTN1_HUMAN Spectrin alpha chain, non-erythrocytic 1 OS=Homo sapiens GN=SPTAN1 PE=1 SV=3	Q13813	285 kDa	0	0	0	7	12	9.5		0	0	0	5.96886	6.7373	6.35308	#DIV/0!	0.00363761
SRC8_HUMAN Src substrate cortactin OS=Homo sapiens GN=CTTN PE=1 SV=2	Q14247	62 kDa	2	2	2	6	7	6.5		1.9987	2.521	2.25985	5.798	4.344	5.071	2.24395	0.067909
KINH_HUMAN Kinesin-1 heavy chain OS=Homo sapiens GN=KIF5B PE=1 SV=1	P33176	110 kDa	3	8	5.5	2	5	3.5		3.077	6.8913	4.98415	1.48911	2.7471	2.1181	0.424968	0.289675
CAPR1_HUMAN Isoform 2 of Caprin-1 OS=Homo sapiens GN=CAPRIN1	Q14444-2	77 kDa	2	5	3.5	5	6	5.5		1.9987	3.8385	2.9186	3.33245	2.88169	3.10707	1.06458	0.860662
BUB3_HUMAN Isoform 2 of Mitotic checkpoint protein BUB3 OS=Homo sapiens GN=BUB3	O43684-2	37 kDa	2	5	3.5	4	5	4.5		3.2349	5.6646	4.44975	2.9782	3.0434	3.0108	0.676622	0.358048
RS18_HUMAN 40S ribosomal protein S18 OS=Homo sapiens GN=RPS18 PE=1 SV=3	P62269	18 kDa	3	3	3	3	4	3.5		12.221	11.891	12.056	11.054	12.57	11.812	0.979761	0.782896
GDE_HUMAN Glycogen debranching enzyme OS=Homo sapiens GN=AGL PE=1 SV=3	P35573	175 kDa	7	4	5.5	4	2	3		9.2482	8.1172	8.6827	3.5696	1.2534	2.4115	0.277736	0.039734
KI67_HUMAN Isoform Short of Antigen KI-67 OS=Homo sapiens GN=MKI67	P46013-2	319 kDa	0	0	0	5	13	9		0	0	0	3.9061	5.9933	4.9497	#DIV/0!	0.0416935
PRP4B_HUMAN Serine/threonine-protein kinase PRP4 homolog OS=Homo sapiens GN=PRPF4B PE=1 SV=3	Q13523	117 kDa	3	4	3.5	3	5	4		4.0113	5.6747	4.843	3.3079	5.51789	4.4129	0.91119	0.785228
F5H041_HUMAN Polyubiquitin-C OS=Homo sapiens GN=UBC PE=2 SV=1	F5H041 (+2)	68 kDa	1	3	2	4	5	4.5		1.4665	9.4613	5.4639	5.5132	3.55349	4.53335	0.82969	0.84213
SERB_HUMAN Phosphoserine phosphatase OS=Homo sapiens GN=PSPH PE=1 SV=2	P78330	25 kDa	4	3	3.5	4	5	4.5		7.3325	4.7306	6.03155	4.4105	3.9923	4.2014	0.696571	0.299294
GLYC_HUMAN Isoform 2 of Serine hydroxymethyltransferase, cytosolic OS=Homo sapiens GN=SHMT1	P34896-2	49 kDa	4	5	4.5	2	6	4		4.602	5.0652	4.8336	1.8434	3.4472	2.6453	0.547273	0.119881
CATA_HUMAN Catalase OS=Homo sapiens GN=CAT PE=1 SV=3	P04040	60 kDa	4	8	6	2	3	2.5		3.6816	5.7888	4.7352	1.2289	1.2927	1.2608	0.266261	0.0810149
E9PGT1_HUMAN Translin OS=Homo sapiens GN=TSN PE=2 SV=1	E9PGT1	26 kDa	0	0	0	7	9	8		0	0	0	7.49045	7.7708	7.63063	#DIV/0!	0.000337288
H2AV_HUMAN Histone H2A.V OS=Homo sapiens GN=H2AFV PE=1 SV=3	Q71UI9	14 kDa	3	3	3	4	4	4		16.6205	22.5666	19.5936	19.8865	21.2579	20.5722	1.04995	0.778811
PAIRB_HUMAN Plasminogen activator inhibitor 1 RNA-binding protein OS=Homo sapiens GN=SERBP1 PE=1 SV=2	Q8NC51	45 kDa	1	1	1	4	6	5		2.1566	1.5769	1.86675	3.5927	4.99996	4.29633	2.3015	0.0856851
RS19_HUMAN 40S ribosomal protein S19 OS=Homo sapiens GN=RPS19 PE=1 SV=2	P39019	16 kDa	2	5	3.5	5	4	4.5		6.1104	14.863	10.4867	8.60965	8.34046	8.47506	0.808172	0.691017
J3KPS3_HUMAN Fructose-bisphosphate aldolase OS=Homo sapiens GN=ALDOA PE=2 SV=1	J3KPS3 (+1)	40 kDa	2	3	2.5	4	7	5.5		2.1566	2.8323	2.49445	3.23846	4.2015	3.71998	1.4913	0.172606
NUMA1_HUMAN Isoform 2 of Nuclear mitotic apparatus protein 1 OS=Homo sapiens GN=NUMA1	Q14980-2	237 kDa	0	0	0	3	13	8		0	0	0	2.12129	7.07289	4.59709	#DIV/0!	0.204465
PLD3_HUMAN Phospholipase D3 OS=Homo sapiens GN=PLD3 PE=1 SV=1	Q8IV08	55 kDa	3	5	4	3	5	4		2.7612	3.618	3.1896	1.8434	2.1545	1.99895	0.626709	0.120589
B7Z904_HUMAN Thioredoxin reductase 1 OS=Homo sapiens GN=TXNRD1 PE=2 SV=1	B7Z904 (+1)	71 kDa	1	2	1.5	6	6	6		0.9204	1.4472	1.1838	3.6867	3.21211	3.44941	2.91384	0.0236223
PABP1_HUMAN Polyadenylate-binding protein 1 OS=Homo sapiens GN=PABPC1 PE=1 SV=2	P11940	71 kDa	1	1	1	8	6	7		0.9204	0.7236	0.822	4.9156	2.5854	3.7505	4.56265	0.129224
DHX15_HUMAN Putative pre-mRNA-splicing factor ATP-dependent RNA helicase DHX15 OS=Homo sapiens GN=DHX15 PE=1 SV=2	O43143	91 kDa	3	2	2.5	5	5	5		3.162	1.4472	2.3046	3.6282	2.35031	2.98925	1.29708	0.587551
D6RD18_HUMAN Heterogeneous nuclear ribonucleoprotein A/B OS=Homo sapiens GN=HNRNPAB PE=2 SV=1	D6RD18	30 kDa	0	0	0	7	8	7.5		0	0	0	5.798	4.70366	5.25083	#DIV/0!	0.0106852
C9JRZ6_HUMAN Coiled-coil-helix-coiled-coil-helix domain-containing protein 3, mitochondrial OS=Homo sapiens GN=CHCHD3 PE=2 SV=1	C9JRZ6 (+1)	27 kDa	1	0	0.5	5	8	6.5		1.4665	0	0.73325	5.9319	5.8063	5.8691	8.00423	0.0199215
SERC_HUMAN Phosphoserine aminotransferase OS=Homo sapiens GN=PSAT1 PE=1 SV=2	Q9Y617	40 kDa	2	2	2	3	8	5.5		2.1566	1.8882	2.0224	2.36376	4.9287	3.64623	1.80292	0.334982
1433G_HUMAN 14-3-3 protein gamma OS=Homo sapiens GN=YWHAG PE=1 SV=2	P61981	28 kDa	1	1	1	6	7	6.5		4.3995	6.3075	5.3535	8.59305	10.0237	9.30837	1.73875	0.0801285
PEPD_HUMAN Xaa-Pro dipeptidase OS=Homo sapiens GN=PEPD PE=1 SV=3	P12955	55 kDa	3	2	2.5	3	7	5		2.7612	1.4472	2.1042	1.8434	3.4079	2.62565	1.24781	0.660496
SYNC_HUMAN Asparagine--tRNA ligase, cytoplasmic OS=Homo sapiens GN=NARS PE=1 SV=1	O43776	63 kDa	4	3	3.5	4	4	4		3.6816	2.1708	2.9262	2.4578	1.7236	2.0907	0.714476	0.42466
AIFM1_HUMAN Apoptosis-inducing factor 1, mitochondrial OS=Homo sapiens GN=AIFM1 PE=1 SV=1	O95831	67 kDa	3	3	3	3	6	4.5		2.7612	2.1708	2.466	1.8434	2.5854	2.2144	0.897972	0.648677
SEP11_HUMAN Septin-11 OS=Homo sapiens GN=SEPT11 PE=1 SV=3	Q9NVA2	49 kDa	2	5	3.5	4	4	4		1.8408	3.618	2.7294	2.4578	1.7236	2.0907	0.765993	0.574831
NPS3A_HUMAN Protein NipSnap homolog 3A OS=Homo sapiens GN=NIPSNAP3A PE=1 SV=2	Q9UFN0	28 kDa	4	2	3	2	7	4.5		5.866	3.1538	4.5099	2.2053	5.5892	3.89725	0.864154	0.804084
LKHA4_HUMAN Leukotriene A-4 hydrolase OS=Homo sapiens GN=LTA4H PE=1 SV=2	P09960	69 kDa	1	5	3	3	5	4		0.9204	4.3416	2.631	1.8434	2.1545	1.99895	0.759768	0.748189
SRRT_HUMAN Serrate RNA effector molecule homolog OS=Homo sapiens GN=SRRT PE=1 SV=1	Q9BXP5 (+3)	101 kDa	2	3	2.5	4	5	4.5		1.9987	2.6118	2.30525	2.9782	2.45079	2.7145	1.17753	0.418035
BACH_HUMAN Isoform 4 of Cytosolic acyl coenzyme A thioester hydrolase OS=Homo sapiens GN=ACOT7	O00154-4	37 kDa	2	5	3.5	3	4	3.5		2.1566	4.7205	3.43855	2.10355	2.3162	2.20988	0.642676	0.440298
DHSB_HUMAN Succinate dehydrogenase [ubiquinone] iron-sulfur subunit, mitochondrial OS=Homo sapiens GN=SDHB PE=1 SV=3	P21912	32 kDa	0	1	0.5	4	8	6		0	1.5769	0.78845	3.9546	6.9723	5.46345	6.92936	0.110969
F5H039_HUMAN Molybdopterin molybdenumtransferase OS=Homo sapiens GN=GPHN PE=2 SV=1	F5H039	85 kDa	5	2	3.5	4	3	3.5		6.6059	2.347	4.47645	3.5696	1.8801	2.72485	0.608708	0.524408
E7EU96_HUMAN Casein kinase II subunit alpha OS=Homo sapiens GN=CSNK2A1 PE=2 SV=1	E7EU96	45 kDa	4	4	4	3	2	2.5		4.3132	4.7205	4.51685	2.624	1.4544	2.0392	0.451465	0.0571626
NUCB1_HUMAN Nucleobindin-1 OS=Homo sapiens GN=NUCB1 PE=1 SV=4	Q02818	54 kDa	2	3	2.5	3	6	4.5		1.8408	2.1708	2.0058	1.8434	2.5854	2.2144	1.104	0.658558
ACADV_HUMAN Very long-chain specific acyl-CoA dehydrogenase, mitochondrial OS=Homo sapiens GN=ACADVL PE=1 SV=1	P49748	70 kDa	0	0	0	6	7	6.5		0	0	0	4.3012	3.0163	3.65875	#DIV/0!	0.0294764
ADK_HUMAN Adenosine kinase OS=Homo sapiens GN=ADK PE=1 SV=2	P55263	41 kDa	2	2	2	6	3	4.5		2.1566	1.8882	2.0224	4.7275	1.58899	3.15824	1.56163	0.545709
PITH1_HUMAN PITH domain-containing protein 1 OS=Homo sapiens GN=PITHD1 PE=1 SV=1	Q9GZP4 (+1)	24 kDa	3	2	2.5	5	3	4		4.3995	3.1538	3.77665	5.28515	2.3954	3.84028	1.01685	0.971418
GGPPS_HUMAN Geranylgeranyl pyrophosphate synthase OS=Homo sapiens GN=GGPS1 PE=1 SV=1	O95749	35 kDa	2	3	2.5	3	4	3.5		2.1566	3.7764	2.9665	2.624	2.9088	2.7664	0.932547	0.830428
MOV10_HUMAN Putative helicase MOV-10 OS=Homo sapiens GN=MOV10 PE=1 SV=2	Q9HCE1	114 kDa	4	2	3	2	5	3.5		5.2847	3.2469	4.2658	1.7848	3.1335	2.45915	0.57648	0.277328
PRP19_HUMAN Pre-mRNA-processing factor 19 OS=Homo sapiens GN=PRPF19 PE=1 SV=1	Q9UMS4	55 kDa	6	4	5	0	3	1.5		5.5224	2.8944	4.2084	0	1.58899	0.794495	0.188788	0.156234
K1C16_HUMAN Keratin, type I cytoskeletal 16 OS=Homo sapiens GN=KRT16 PE=1 SV=4	P08779	51 kDa	5	2	3.5	2	3	2.5		35.4435	10.7298	23.0866	5.2479	8.5422	6.89505	0.29866	0.323573
MDHC_HUMAN Malate dehydrogenase, cytoplasmic OS=Homo sapiens GN=MDH1 PE=1 SV=4	P40925 (+1)	36 kDa	1	2	1.5	2	7	4.5		1.0783	1.8882	1.48325	1.48911	4.4978	2.99345	2.01817	0.434614
CH60_HUMAN 60 kDa heat shock protein, mitochondrial OS=Homo sapiens GN=HSPD1 PE=1 SV=2	P10809	61 kDa	1	1	1	3	6	4.5		0.9204	0.7236	0.822	1.8434	3.31259	2.578	3.13625	0.141335
CPT2_HUMAN Carnitine O-palmitoyltransferase 2, mitochondrial OS=Homo sapiens GN=CPT2 PE=1 SV=2	P23786	74 kDa	2	4	3	2	3	2.5		1.8408	2.8944	2.3676	1.8434	1.2927	1.56805	0.662295	0.310823
QORL1_HUMAN Quinone oxidoreductase-like protein 1 OS=Homo sapiens GN=CRYZL1 PE=1 SV=2	O95825	39 kDa	1	2	1.5	4	5	4.5		1.0783	1.8882	1.48325	3.4986	3.636	3.5673	2.40506	0.0367168
MAT2B_HUMAN Methionine adenosyltransferase 2 subunit beta OS=Homo sapiens GN=MAT2B PE=1 SV=1	Q9NZL9	38 kDa	3	3	3	1	2	1.5		4.3132	4.7205	4.51685	0.87465	1.4544	1.16453	0.257818	0.0109838
TRM6_HUMAN tRNA (adenine(58)-N(1))-methyltransferase non-catalytic subunit TRM6 OS=Homo sapiens GN=TRMT6 PE=1 SV=1	Q9UJA5	56 kDa	2	1	1.5	3	5	4		2.3869	1.5769	1.9819	2.59171	2.7471	2.6694	1.34689	0.237416
BAG6_HUMAN Isoform 5 of Large proline-rich protein BAG6 OS=Homo sapiens GN=BAG6	P46379-5	113 kDa	3	2	2.5	2	4	3		3.162	1.4472	2.3046	1.2289	2.1152	1.67205	0.725527	0.579527
Q96RR5_HUMAN Hepatocellular carcinoma-associated antigen 90 OS=Homo sapiens GN=HCA90 PE=2 SV=1	Q96RR5 (+1)	89 kDa	0	0	0	5	6	5.5		0	0	0	3.9061	3.46909	3.6876	#DIV/0!	0.00349266
GGH_HUMAN Gamma-glutamyl hydrolase OS=Homo sapiens GN=GGH PE=1 SV=2	Q92820	36 kDa	3	2	2.5	3	3	3		3.2349	1.8882	2.56155	2.624	2.1816	2.4028	0.938026	0.843568
UGDH_HUMAN UDP-glucose 6-dehydrogenase OS=Homo sapiens GN=UGDH PE=1 SV=1	O60701	55 kDa	3	3	3	3	2	2.5		2.7612	2.1708	2.466	1.8434	0.8618	1.3526	0.5485	0.191342
NQO2_HUMAN Ribosyldihydronicotinamide dehydrogenase [quinone] OS=Homo sapiens GN=NQO2 PE=1 SV=5	P16083 (+1)	26 kDa	1	2	1.5	4	4	4		1.4665	3.1538	2.31015	4.4105	3.1938	3.80215	1.64585	0.287886
MPPA_HUMAN Mitochondrial-processing peptidase subunit alpha OS=Homo sapiens GN=PMPCA PE=1 SV=2	Q10713	58 kDa	0	6	3	2	3	2.5		0	4.3416	2.1708	1.2289	1.48851	1.35871	0.625901	0.744694
AMRP_HUMAN Alpha-2-macroglobulin receptor-associated protein OS=Homo sapiens GN=LRPAP1 PE=1 SV=1	P30533	41 kDa	4	2	3	2	2	2		4.7014	1.8882	3.2948	1.97725	1.52565	1.75145	0.53158	0.39188
MMTA2_HUMAN Multiple myeloma tumor-associated protein 2 OS=Homo sapiens GN=MMTAG2 PE=1 SV=1	Q9BU76	29 kDa	2	1	1.5	2	4	3		2.933	1.5769	2.25495	3.07995	2.75499	2.91747	1.29381	0.442302
SIN3A_HUMAN Paired amphipathic helix protein Sin3a OS=Homo sapiens GN=SIN3A PE=1 SV=2	Q96ST3	145 kDa	0	1	0.5	5	4	4.5		0	0.7236	0.3618	3.5927	2.3162	2.95445	8.16598	0.0715847
GMDS_HUMAN GDP-mannose 4,6 dehydratase OS=Homo sapiens GN=GMDS PE=1 SV=1	O60547	42 kDa	3	2	2.5	1	4	2.5		3.2349	1.8882	2.56155	0.61446	2.3162	1.46533	0.572048	0.418715
MYH9_HUMAN Myosin-9 OS=Homo sapiens GN=MYH9 PE=1 SV=4	P35579	227 kDa	0	0	0	4	6	5		0	0	0	3.0137	3.66489	3.33929	#DIV/0!	0.00937359
C1QBP_HUMAN Complement component 1 Q subcomponent-binding protein, mitochondrial OS=Homo sapiens GN=C1QBP PE=1 SV=1	Q07021	31 kDa	0	1	0.5	3	4	3.5		0	1.5769	0.78845	4.18255	3.92099	4.05177	5.13891	0.0550731
BPNT1_HUMAN 3'(2'),5'-bisphosphate nucleotidase 1 OS=Homo sapiens GN=BPNT1 PE=1 SV=1	O95861	33 kDa	3	2	2.5	1	4	2.5		3.2349	1.8882	2.56155	0.61446	2.6125	1.61348	0.629884	0.51376
GTPC1_HUMAN Putative GTP cyclohydrolase 1 type 2 NIF3L1 OS=Homo sapiens GN=NIF3L1 PE=1 SV=2	Q9GZT8 (+1)	42 kDa	2	3	2.5	2	2	2		2.1566	3.7764	2.9665	1.7493	1.4544	1.60185	0.53998	0.23923
PSA_HUMAN Puromycin-sensitive aminopeptidase OS=Homo sapiens GN=NPEPPS PE=1 SV=2	P55786	103 kDa	3	1	2	4	2	3		3.9635	1.6234	2.79345	3.5696	1.2534	2.4115	0.863269	0.838109
SSDH_HUMAN Succinate-semialdehyde dehydrogenase, mitochondrial OS=Homo sapiens GN=ALDH5A1 PE=1 SV=2	P51649 (+1)	57 kDa	2	1	1.5	3	4	3.5		1.8408	0.7236	1.2822	1.8434	1.7236	1.7835	1.39097	0.466384
DCTP1_HUMAN dCTP pyrophosphatase 1 OS=Homo sapiens GN=DCTPP1 PE=1 SV=1	Q9H773	19 kDa	0	0	0	3	6	4.5		0	0	0	3.9546	4.577	4.2658	#DIV/0!	0.00527993
Q5T6W5_HUMAN Heterogeneous nuclear ribonucleoprotein K OS=Homo sapiens GN=HNRNPK PE=4 SV=1	Q5T6W5	48 kDa	0	0	0	6	3	4.5		0	0	0	4.9555	1.7236	3.33955	#DIV/0!	0.174732
GOGA3_HUMAN Isoform 2 of Golgin subfamily A member 3 OS=Homo sapiens GN=GOLGA3	Q08378-2	156 kDa	5	0	2.5	4	1	2.5		6.6059	0	3.30295	3.5696	0.62671	2.09815	0.635237	0.770674
FLNB_HUMAN Filamin-B OS=Homo sapiens GN=FLNB PE=1 SV=2	O75369 (+3)	278 kDa	0	0	0	5	4	4.5		0	0	0	5.96886	3.7603	4.86458	#DIV/0!	0.0478616
CTNA1_HUMAN Catenin alpha-1 OS=Homo sapiens GN=CTNNA1 PE=1 SV=1	P35221	100 kDa	0	0	0	2	7	4.5		0	0	0	1.7848	5.0137	3.39925	#DIV/0!	0.169872
TR150_HUMAN Thyroid hormone receptor-associated protein 3 OS=Homo sapiens GN=THRAP3 PE=1 SV=2	Q9Y2W1	109 kDa	3	1	2	2	3	2.5		5.9882	0.7236	3.3559	1.71706	2.0278	1.87243	0.557952	0.630366
POP1_HUMAN Ribonucleases P/MRP protein subunit POP1 OS=Homo sapiens GN=POP1 PE=1 SV=2	Q99575	115 kDa	3	2	2.5	2	2	2		3.5627	1.4472	2.50495	1.7848	1.05761	1.42121	0.567359	0.434796
HIBCH_HUMAN 3-hydroxyisobutyryl-CoA hydrolase, mitochondrial OS=Homo sapiens GN=HIBCH PE=1 SV=2	Q6NVY1	43 kDa	1	2	1.5	2	4	3		1.0783	1.8882	1.48325	1.48911	2.6125	2.0508	1.38264	0.498561
E9PK91_HUMAN Bcl-2-associated transcription factor 1 OS=Homo sapiens GN=BCLAF1 PE=2 SV=1	E9PK91 (+3)	100 kDa	1	2	1.5	1	5	3		1.0783	1.4472	1.26275	0.87465	2.6466	1.76063	1.39428	0.637449
NIT1_HUMAN Nitrilase homolog 1 OS=Homo sapiens GN=NIT1 PE=1 SV=2	Q86X76 (+2)	36 kDa	2	2	2	1	4	2.5		2.1566	1.8882	2.0224	0.87465	2.3162	1.59542	0.788877	0.619221
TCEA1_HUMAN Transcription elongation factor A protein 1 OS=Homo sapiens GN=TCEA1 PE=1 SV=2	P23193	34 kDa	0	0	0	3	6	4.5		0	0	0	2.36376	3.84186	3.10281	#DIV/0!	0.0523206
H0YA96_HUMAN Heterogeneous nuclear ribonucleoprotein D0 (Fragment) OS=Homo sapiens GN=HNRNPD PE=4 SV=1	H0YA96	24 kDa	0	1	0.5	4	4	4		0	0.9441	0.47205	2.9782	3.4743	3.22625	6.83455	0.0355025
UB2L3_HUMAN Ubiquitin-conjugating enzyme E2 L3 OS=Homo sapiens GN=UBE2L3 PE=1 SV=1	P68036	18 kDa	0	0	0	4	4	4		0	0	0	4.8293	2.68376	3.75653	#DIV/0!	0.0727638
CPSF6_HUMAN Isoform 3 of Cleavage and polyadenylation specificity factor subunit 6 OS=Homo sapiens GN=CPSF6	Q16630-3	52 kDa	2	2	2	2	2	2		4.3995	3.1538	3.77665	2.2053	1.5969	1.9011	0.503383	0.113752
PRDX5_HUMAN Isoform Cytoplasmic+peroxisomal of Peroxiredoxin-5, mitochondrial OS=Homo sapiens GN=PRDX5	P30044-2	17 kDa	0	0	0	5	4	4.5		0	0	0	7.0456	4.6956	5.8706	#DIV/0!	0.037803
PININ_HUMAN Pinin OS=Homo sapiens GN=PNN PE=1 SV=4	Q9H307	82 kDa	0	0	0	1	8	4.5		0	0	0	0.89239	4.52669	2.70954	#DIV/0!	0.274436
LMNB1_HUMAN Lamin-B1 OS=Homo sapiens GN=LMNB1 PE=1 SV=2	P20700	66 kDa	1	3	2	1	4	2.5		1.8408	2.8944	2.3676	1.2289	2.1545	1.6917	0.714521	0.436798
IDE_HUMAN Insulin-degrading enzyme OS=Homo sapiens GN=IDE PE=1 SV=4	P14735	118 kDa	2	0	1	3	3	3		2.6423	0	1.32115	2.6772	2.5068	2.592	1.96193	0.438383
BASI_HUMAN Isoform 4 of Basigin OS=Homo sapiens GN=BSG	P35613-4	23 kDa	2	2	2	1	3	2		1.9987	1.6677	1.8332	0.87465	1.58899	1.23182	0.671951	0.266162
SPHM_HUMAN N-sulphoglucosamine sulphohydrolase OS=Homo sapiens GN=SGSH PE=1 SV=1	P51688	57 kDa	2	1	1.5	1	4	2.5		1.9987	0.7236	1.36115	0.61446	2.01989	1.31718	0.967693	0.967246
HINT1_HUMAN Histidine triad nucleotide-binding protein 1 OS=Homo sapiens GN=HINT1 PE=1 SV=2	P49773	14 kDa	1	1	1	3	3	3		3.0552	2.9726	3.0139	5.29625	5.75519	5.52572	1.83341	0.00850649
SF3B4_HUMAN Splicing factor 3B subunit 4 OS=Homo sapiens GN=SF3B4 PE=1 SV=1	Q15427	44 kDa	3	2	2.5	1	2	1.5		3.077	1.6677	2.37235	0.61446	0.8618	0.73813	0.311139	0.149757
CAPZB_HUMAN Isoform 2 of F-actin-capping protein subunit beta OS=Homo sapiens GN=CAPZB	P47756-2	31 kDa	0	0	0	4	4	4		0	0	0	3.20615	2.3162	2.76117	#DIV/0!	0.0250009
HEM3_HUMAN Isoform 2 of Porphobilinogen deaminase OS=Homo sapiens GN=HMBS	P08397-2	38 kDa	2	0	1	4	2	3		2.1566	0	1.0783	2.9782	1.15809	2.06815	1.91797	0.555621
PCNA_HUMAN Proliferating cell nuclear antigen OS=Homo sapiens GN=PCNA PE=1 SV=1	P12004	29 kDa	1	1	1	2	3	2.5		1.0783	0.9441	1.0112	1.97725	2.9088	2.44303	2.41597	0.0931676
M0QZN2_HUMAN 40S ribosomal protein S5 OS=Homo sapiens GN=RPS5 PE=2 SV=1	M0QZN2 (+3)	15 kDa	1	0	0.5	2	4	3		1.4665	0	0.73325	2.8519	3.0513	2.9516	4.02537	0.0955877
ARP3_HUMAN Actin-related protein 3 OS=Homo sapiens GN=ACTR3 PE=1 SV=3	P61158	47 kDa	1	1	1	2	4	3		1.0783	0.9441	1.0112	1.7493	2.3162	2.03275	2.01024	0.0725656
MEP50_HUMAN Methylosome protein 50 OS=Homo sapiens GN=WDR77 PE=1 SV=1	Q9BQA1	37 kDa	2	3	2.5	1	2	1.5		2.1566	2.8323	2.49445	0.87465	1.15809	1.01637	0.407453	0.0563006
RS10_HUMAN 40S ribosomal protein S10 OS=Homo sapiens GN=RPS10 PE=1 SV=1	P46783	19 kDa	1	2	1.5	3	2	2.5		1.4665	3.1538	2.31015	3.3079	1.5969	2.4524	1.06158	0.916576
EXOS4_HUMAN Exosome complex component RRP41 OS=Homo sapiens GN=EXOSC4 PE=1 SV=3	Q9NPD3	26 kDa	1	1	1	2	3	2.5		1.4665	1.5769	1.5217	2.2053	3.1938	2.69955	1.77404	0.141419
PIMT_HUMAN Protein-L-isoaspartate(D-aspartate) O-methyltransferase OS=Homo sapiens GN=PCMT1 PE=1 SV=4	P22061 (+1)	25 kDa	0	2	1	2	3	2.5		0	3.1538	1.5769	2.2053	3.12259	2.66395	1.68936	0.576084
PSA2_HUMAN Proteasome subunit alpha type-2 OS=Homo sapiens GN=PSMA2 PE=1 SV=2	P25787	26 kDa	1	1	1	3	3	3		1.4665	1.5769	1.5217	3.3079	2.3954	2.85165	1.87399	0.101547
SYMM_HUMAN Methionine--tRNA ligase, mitochondrial OS=Homo sapiens GN=MARS2 PE=1 SV=2	Q96GW9	67 kDa	2	3	2.5	0	2	1		1.8408	2.1708	2.0058	0	1.48851	0.744255	0.371051	0.239782
PPIA_HUMAN Peptidyl-prolyl cis-trans isomerase A OS=Homo sapiens GN=PPIA PE=1 SV=2	P62937	18 kDa	0	0	0	5	2	3.5		0	0	0	7.0456	2.1816	4.6136	#DIV/0!	0.198266
MMSA_HUMAN Methylmalonate-semialdehyde dehydrogenase [acylating], mitochondrial OS=Homo sapiens GN=ALDH6A1 PE=1 SV=2	Q02252	58 kDa	0	0	0	3	5	4		0	0	0	1.8434	2.35031	2.09685	#DIV/0!	0.0142979
H2AX_HUMAN Histone H2AX OS=Homo sapiens GN=H2AFX PE=1 SV=2	P16104	15 kDa	1	3	2	2	1	1.5		9.1656	25.5386	17.3521	14.3564	15.084	14.7202	0.848324	0.778534
K2C73_HUMAN Keratin, type II cytoskeletal 73 OS=Homo sapiens GN=KRT73 PE=1 SV=1	Q86Y46	59 kDa	3	1	2	2	1	1.5		4.0113	0.9441	2.4777	3.10319	0.62671	1.86495	0.752694	0.785308
PDIA6_HUMAN Isoform 2 of Protein disulfide-isomerase A6 OS=Homo sapiens GN=PDIA6	Q15084-2	54 kDa	0	1	0.5	2	4	3		0	0.7236	0.3618	1.48911	2.01989	1.7545	4.84936	0.0900059
B5MCX3_HUMAN Septin-2 OS=Homo sapiens GN=SEPT2 PE=2 SV=1	B5MCX3 (+2)	37 kDa	2	2	2	0	3	1.5		2.5448	2.521	2.5329	0	2.25286	1.12643	0.444719	0.338169
F10A1_HUMAN Hsc70-interacting protein OS=Homo sapiens GN=ST13 PE=1 SV=2	P50502	41 kDa	0	1	0.5	2	4	3		0	0.7236	0.3618	1.48911	2.3162	1.90265	5.25886	0.107118
1433T_HUMAN 14-3-3 protein theta OS=Homo sapiens GN=YWHAQ PE=1 SV=1	P27348	28 kDa	0	0	0	4	3	3.5		0	0	0	6.1598	7.6995	6.92965	#DIV/0!	0.0121182
EXOS6_HUMAN Exosome complex component MTR3 OS=Homo sapiens GN=EXOSC6 PE=1 SV=1	Q5RKV6	28 kDa	0	1	0.5	4	2	3		0	1.5769	0.78845	4.4105	1.52565	2.96807	3.76444	0.316031
MTAP_HUMAN S-methyl-5'-thioadenosine phosphorylase OS=Homo sapiens GN=MTAP PE=1 SV=2	Q13126	31 kDa	0	3	1.5	1	3	2		0	2.8323	1.41615	0.87465	2.25286	1.56376	1.10423	0.933873
GRP75_HUMAN Stress-70 protein, mitochondrial OS=Homo sapiens GN=HSPA9 PE=1 SV=2	P38646	74 kDa	1	0	0.5	2	4	3		0.9204	0	0.4602	1.2289	1.91941	1.57416	3.42059	0.192461
PSB5_HUMAN Proteasome subunit beta type-5 OS=Homo sapiens GN=PSMB5 PE=1 SV=3	P28074	28 kDa	1	0	0.5	4	2	3		1.4665	0	0.73325	4.4105	1.5969	3.0037	4.09642	0.288691
DPYL5_HUMAN Dihydropyrimidinase-related protein 5 OS=Homo sapiens GN=DPYSL5 PE=1 SV=1	Q9BPU6	61 kDa	0	1	0.5	4	2	3		0	0.7236	0.3618	2.4578	0.8618	1.6598	4.58762	0.276677
TXLNA_HUMAN Alpha-taxilin OS=Homo sapiens GN=TXLNA PE=1 SV=3	P40222	62 kDa	0	0	0	3	4	3.5		0	0	0	1.8434	1.91941	1.8814	#DIV/0!	0.000407804
PSA7_HUMAN Proteasome subunit alpha type-7 OS=Homo sapiens GN=PSMA7 PE=1 SV=1	O14818	28 kDa	0	0	0	2	5	3.5		0	0	0	2.2053	3.9923	3.0988	#DIV/0!	0.0740252
PSB3_HUMAN Proteasome subunit beta type-3 OS=Homo sapiens GN=PSMB3 PE=1 SV=2	P49720	23 kDa	0	0	0	2	3	2.5		0	0	0	3.3079	3.1938	3.25085	#DIV/0!	0.000307834
KTN1_HUMAN Kinectin OS=Homo sapiens GN=KTN1 PE=1 SV=1	Q86UP2 (+1)	156 kDa	0	0	0	2	5	3.5		0	0	0	1.7848	3.1335	2.45915	#DIV/0!	0.0676549
TOP1_HUMAN DNA topoisomerase 1 OS=Homo sapiens GN=TOP1 PE=1 SV=2	P11387	91 kDa	1	2	1.5	1	2	1.5		1.4665	3.1538	2.31015	1.1026	1.52565	1.31412	0.568848	0.370693
OXSM_HUMAN 3-oxoacyl-[acyl-carrier-protein] synthase, mitochondrial OS=Homo sapiens GN=OXSM PE=1 SV=1	Q9NWU1	49 kDa	2	1	1.5	2	1	1.5		2.1566	0.9441	1.55035	1.7493	0.72719	1.23825	0.798687	0.731863
PTER_HUMAN Phosphotriesterase-related protein OS=Homo sapiens GN=PTER PE=1 SV=1	Q96BW5 (+1)	39 kDa	2	2	2	1	1	1		2.1566	1.8882	2.0224	0.87465	0.72719	0.80092	0.396025	0.0153532
B7Z3I9_HUMAN Delta-aminolevulinic acid dehydratase OS=Homo sapiens GN=ALAD PE=2 SV=1	B7Z3I9 (+1)	35 kDa	3	1	2	1	1	1		3.2349	0.9441	2.0895	0.87465	0.72719	0.80092	0.383307	0.378244
IVD_HUMAN Isovaleryl-CoA dehydrogenase, mitochondrial OS=Homo sapiens GN=IVD PE=1 SV=1	P26440	46 kDa	2	2	2	1	1	1		2.1566	1.8882	2.0224	0.87465	0.72719	0.80092	0.396025	0.0153532
CAP1_HUMAN Adenylyl cyclase-associated protein 1 OS=Homo sapiens GN=CAP1 PE=1 SV=5	Q01518	52 kDa	1	2	1.5	1	2	1.5		0.9204	1.4472	1.1838	0.61446	0.8618	0.73813	0.623526	0.265304
G3V5Z7_HUMAN Proteasome subunit alpha type OS=Homo sapiens GN=PSMA6 PE=2 SV=1	G3V5Z7 (+1)	28 kDa	1	0	0.5	1	4	2.5		1.4665	0	0.73325	1.1026	3.1938	2.1482	2.9297	0.383284
NUP43_HUMAN Nucleoporin Nup43 OS=Homo sapiens GN=NUP43 PE=1 SV=1	Q8NFH3	42 kDa	0	1	0.5	2	3	2.5		0	0.9441	0.47205	1.7493	2.1816	1.96545	4.16365	0.102597
PRDX2_HUMAN Peroxiredoxin-2 OS=Homo sapiens GN=PRDX2 PE=1 SV=5	P32119	22 kDa	1	0	0.5	2	3	2.5		2.933	0	1.4665	4.4105	3.9923	4.2014	2.86492	0.206136
IDHC_HUMAN Isocitrate dehydrogenase [NADP] cytoplasmic OS=Homo sapiens GN=IDH1 PE=1 SV=2	O75874	47 kDa	1	0	0.5	1	4	2.5		1.0783	0	0.53915	0.87465	2.9088	1.89172	3.50872	0.360948
SNUT1_HUMAN U4/U6.U5 tri-snRNP-associated protein 1 OS=Homo sapiens GN=SART1 PE=1 SV=1	O43290	90 kDa	1	0	0.5	2	3	2.5		1.4665	0	0.73325	2.2053	2.3954	2.30035	3.1372	0.168174
GRPE1_HUMAN GrpE protein homolog 1, mitochondrial OS=Homo sapiens GN=GRPEL1 PE=1 SV=2	Q9HAV7	24 kDa	0	1	0.5	2	3	2.5		0	1.5769	0.78845	2.2053	2.3954	2.30035	2.91756	0.197252
PNPH_HUMAN Purine nucleoside phosphorylase OS=Homo sapiens GN=PNP PE=1 SV=2	P00491	32 kDa	1	0	0.5	2	3	2.5		1.0783	0	0.53915	2.2053	2.1816	2.19345	4.06835	0.0918599
MECP2_HUMAN Isoform B of Methyl-CpG-binding protein 2 OS=Homo sapiens GN=MECP2	P51608-2	53 kDa	0	1	0.5	2	3	2.5		0	0.7236	0.3618	1.2289	1.2927	1.2608	3.4848	0.131729
SCOT1_HUMAN Succinyl-CoA:3-ketoacid coenzyme A transferase 1, mitochondrial OS=Homo sapiens GN=OXCT1 PE=1 SV=1	P55809	56 kDa	1	3	2	0	2	1		0.9204	2.1708	1.5456	0	0.8618	0.4309	0.278791	0.279812
ERO1A_HUMAN ERO1-like protein alpha OS=Homo sapiens GN=ERO1L PE=1 SV=2	Q96HE7	54 kDa	0	0	0	3	3	3		0	0	0	1.8434	1.2927	1.56805	#DIV/0!	0.0294788
2ABA_HUMAN Serine/threonine-protein phosphatase 2A 55 kDa regulatory subunit B alpha isoform OS=Homo sapiens GN=PPP2R2A PE=1 SV=1	P63151 (+1)	52 kDa	0	0	0	3	2	2.5		0	0	0	1.8434	1.2927	1.56805	#DIV/0!	0.0294788
ACOC_HUMAN Cytoplasmic aconitate hydratase OS=Homo sapiens GN=ACO1 PE=1 SV=3	P21399	98 kDa	0	0	0	2	4	3		0	0	0	1.7848	2.5068	2.1458	#DIV/0!	0.0271556
PUR9_HUMAN Bifunctional purine biosynthesis protein PURH OS=Homo sapiens GN=ATIC PE=1 SV=3	P31939	65 kDa	0	2	1	0	3	1.5		0	1.4472	0.7236	0	1.7236	0.8618	1.19099	0.913484
TXLNG_HUMAN Gamma-taxilin OS=Homo sapiens GN=TXLNG PE=1 SV=2	Q9NUQ3	61 kDa	0	0	0	2	4	3		0	0	0	1.2289	1.7236	1.47625	#DIV/0!	0.0269445
FKBP3_HUMAN Peptidyl-prolyl cis-trans isomerase FKBP3 OS=Homo sapiens GN=FKBP3 PE=1 SV=1	Q00688	25 kDa	0	0	0	2	3	2.5		0	0	0	1.97725	2.32409	2.15067	#DIV/0!	0.00643932
B7Z9I1_HUMAN Medium-chain-specific acyl-CoA dehydrogenase, mitochondrial OS=Homo sapiens GN=ACADM PE=2 SV=1	B7Z9I1	42 kDa	2	1	1.5	1	1	1		2.1566	0.9441	1.55035	0.87465	0.4309	0.652775	0.42105	0.298936
SKP1_HUMAN S-phase kinase-associated protein 1 OS=Homo sapiens GN=SKP1 PE=1 SV=2	P63208	19 kDa	0	0	0	2	3	2.5		0	0	0	1.97725	2.32409	2.15067	#DIV/0!	0.00643932
F8VXC8_HUMAN SWI/SNF complex subunit SMARCC2 OS=Homo sapiens GN=SMARCC2 PE=2 SV=1	F8VXC8 (+2)	136 kDa	1	2	1.5	1	1	1		0.9204	1.4472	1.1838	0.87465	0.72719	0.80092	0.676567	0.296524
GBB1_HUMAN Guanine nucleotide-binding protein G(I)/G(S)/G(T) subunit beta-1 OS=Homo sapiens GN=GNB1 PE=1 SV=3	P62873	37 kDa	1	2	1.5	1	1	1		1.0783	1.8882	1.48325	0.87465	0.72719	0.80092	0.539976	0.239228
F8W1A4_HUMAN Adenylate kinase 2, mitochondrial OS=Homo sapiens GN=AK2 PE=2 SV=1	F8W1A4 (+3)	26 kDa	0	2	1	1	2	1.5		0	3.1538	1.5769	1.1026	1.52565	1.31412	0.83336	0.884002
PARP1_HUMAN Poly [ADP-ribose] polymerase 1 OS=Homo sapiens GN=PARP1 PE=1 SV=4	P09874	113 kDa	0	1	0.5	1	3	2		0	0.7236	0.3618	0.61446	1.58899	1.10173	3.04512	0.347048
GALNS_HUMAN N-acetylgalactosamine-6-sulfatase OS=Homo sapiens GN=GALNS PE=1 SV=1	P34059	58 kDa	1	2	1.5	1	1	1		1.0783	1.8882	1.48325	0.87465	0.79846	0.836555	0.564001	0.252805
YLPM1_HUMAN Isoform 4 of YLP motif-containing protein 1 OS=Homo sapiens GN=YLPM1	P49750-4	242 kDa	0	0	0	2	3	2.5		0	0	0	1.50685	1.6843	1.59558	#DIV/0!	0.00307786
LA_HUMAN Lupus La protein OS=Homo sapiens GN=SSB PE=1 SV=2	P05455	47 kDa	0	0	0	2	3	2.5		0	0	0	1.2289	1.58899	1.40895	#DIV/0!	0.0159401
G5EA52_HUMAN Protein disulfide isomerase family A, member 3, isoform CRA_b OS=Homo sapiens GN=PDIA3 PE=2 SV=1	G5EA52 (+1)	55 kDa	0	0	0	2	3	2.5		0	0	0	1.2289	1.66026	1.44458	#DIV/0!	0.0215727
SSBP_HUMAN Single-stranded DNA-binding protein, mitochondrial OS=Homo sapiens GN=SSBP1 PE=1 SV=1	Q04837	17 kDa	0	1	0.5	2	2	2		0	2.9726	1.4863	4.4216	5.028	4.7248	3.1789	0.166318
FUMH_HUMAN Fumarate hydratase, mitochondrial OS=Homo sapiens GN=FH PE=1 SV=3	P07954	55 kDa	0	1	0.5	1	3	2		0	0.7236	0.3618	0.61446	1.2927	0.95358	2.63566	0.355085
TRM1_HUMAN Isoform 2 of tRNA (guanine(26)-N(2))-dimethyltransferase OS=Homo sapiens GN=TRMT1	Q9NXH9-2	69 kDa	0	0	0	4	1	2.5		0	0	0	2.73579	0.4309	1.58334	#DIV/0!	0.30319
THIM_HUMAN 3-ketoacyl-CoA thiolase, mitochondrial OS=Homo sapiens GN=ACAA2 PE=1 SV=2	P42765	42 kDa	0	2	1	2	1	1.5		0	1.8882	0.9441	1.7493	0.72719	1.23825	1.31156	0.809794
OAT_HUMAN Isoform 2 of Ornithine aminotransferase, mitochondrial OS=Homo sapiens GN=OAT	P04181-2	33 kDa	2	0	1	0	3	1.5		2.1566	0	1.0783	0	1.8853	0.94265	0.8742	0.933178
DPYL2_HUMAN Dihydropyrimidinase-related protein 2 OS=Homo sapiens GN=DPYSL2 PE=1 SV=1	Q16555	62 kDa	0	1	0.5	2	1	1.5		0	0.7236	0.3618	1.8434	0.4309	1.13715	3.14303	0.431569
TIM13_HUMAN Mitochondrial import inner membrane translocase subunit Tim13 OS=Homo sapiens GN=TIMM13 PE=1 SV=1	Q9Y5L4	11 kDa	0	0	0	2	3	2.5		0	0	0	2.2053	2.32409	2.26469	#DIV/0!	0.00068712
XRCC5_HUMAN X-ray repair cross-complementing protein 5 OS=Homo sapiens GN=XRCC5 PE=1 SV=3	P13010	83 kDa	1	0	0.5	2	2	2		0.9204	0	0.4602	1.2289	0.8618	1.04535	2.27151	0.359007
NT5D3_HUMAN 5'-nucleotidase domain-containing protein 3 OS=Homo sapiens GN=NT5DC3 PE=2 SV=1	Q86UY8	63 kDa	1	0	0.5	2	2	2		0.9204	0	0.4602	1.2289	0.8618	1.04535	2.27151	0.359007
U3IP2_HUMAN U3 small nucleolar RNA-interacting protein 2 OS=Homo sapiens GN=RRP9 PE=1 SV=1	O43818	52 kDa	0	4	2	1	0	0.5		0	3.1149	1.55745	0.61446	0	0.30723	0.197265	0.513468
NUCB2_HUMAN Nucleobindin-2 OS=Homo sapiens GN=NUCB2 PE=1 SV=2	P80303 (+1)	50 kDa	1	2	1.5	1	1	1		0.9204	1.4472	1.1838	0.61446	0.4309	0.52268	0.441527	0.141248
E7EPN9_HUMAN Protein PRRC2C OS=Homo sapiens GN=PRRC2C PE=2 SV=1	E7EPN9 (+6)	309 kDa	0	0	0	1	4	2.5		0	0	0	0.61446	2.1152	1.36483	#DIV/0!	0.210549
E7EMN3_HUMAN Bleomycin hydrolase OS=Homo sapiens GN=BLMH PE=2 SV=1	E7EMN3 (+3)	43 kDa	0	0	0	1	3	2		0	0	0	0.87465	2.3162	1.59542	#DIV/0!	0.157311
HDGR2_HUMAN Hepatoma-derived growth factor-related protein 2 OS=Homo sapiens GN=HDGFRP2 PE=1 SV=1	Q7Z4V5 (+1)	74 kDa	0	0	0	1	4	2.5		0	0	0	0.61446	2.1152	1.36483	#DIV/0!	0.210549
RPP30_HUMAN Ribonuclease P protein subunit p30 OS=Homo sapiens GN=RPP30 PE=1 SV=1	P78346 (+1)	29 kDa	0	0	0	3	2	2.5		0	0	0	3.3079	1.5969	2.4524	#DIV/0!	0.103195
E7EX17_HUMAN Eukaryotic translation initiation factor 4B OS=Homo sapiens GN=EIF4B PE=2 SV=1	E7EX17 (+1)	70 kDa	0	0	0	2	3	2.5		0	0	0	1.2289	1.2927	1.2608	#DIV/0!	0.000639547
RCC2_HUMAN Protein RCC2 OS=Homo sapiens GN=RCC2 PE=1 SV=2	Q9P258	56 kDa	0	0	0	2	3	2.5		0	0	0	1.2289	1.2927	1.2608	#DIV/0!	0.000639547
SMU1_HUMAN WD40 repeat-containing protein SMU1 OS=Homo sapiens GN=SMU1 PE=1 SV=2	Q2TAY7	58 kDa	0	3	1.5	0	2	1		0	2.1708	1.0854	0	0.8618	0.4309	0.396996	0.631576
RPIA_HUMAN Ribose-5-phosphate isomerase OS=Homo sapiens GN=RPIA PE=1 SV=3	P49247	33 kDa	0	0	0	2	3	2.5		0	0	0	2.2053	2.3954	2.30035	#DIV/0!	0.00170297
TPM4_HUMAN Tropomyosin alpha-4 chain OS=Homo sapiens GN=TPM4 PE=1 SV=3	P67936	29 kDa	0	0	0	1	4	2.5		0	0	0	5.5132	6.3877	5.95045	#DIV/0!	0.00535624
F8W6I7_HUMAN Heterogeneous nuclear ribonucleoprotein A1 OS=Homo sapiens GN=HNRNPA1 PE=4 SV=2	F8W6I7 (+3)	33 kDa	0	0	0	3	1	2		0	0	0	3.07995	0.79846	1.9392	#DIV/0!	0.231243
HTRA2_HUMAN Serine protease HTRA2, mitochondrial OS=Homo sapiens GN=HTRA2 PE=1 SV=2	O43464	49 kDa	0	1	0.5	1	2	1.5		0	0.9441	0.47205	0.87465	1.4544	1.16453	2.46695	0.337713
F5H2S7_HUMAN Dynactin subunit 2 OS=Homo sapiens GN=DCTN2 PE=2 SV=1	F5H2S7 (+3)	45 kDa	0	0	0	1	3	2		0	0	0	0.61446	1.58899	1.10173	#DIV/0!	0.152181
H3BNQ7_HUMAN 4-aminobutyrate aminotransferase, mitochondrial OS=Homo sapiens GN=ABAT PE=2 SV=1	H3BNQ7 (+1)	58 kDa	0	2	1	1	1	1		0	1.4472	0.7236	0.61446	0.4309	0.52268	0.722333	0.808813
PACN2_HUMAN Protein kinase C and casein kinase substrate in neurons protein 2 OS=Homo sapiens GN=PACSIN2 PE=1 SV=2	Q9UNF0 (+1)	56 kDa	0	0	0	1	3	2		0	0	0	0.87465	1.58899	1.23182	#DIV/0!	0.0747661
STRAP_HUMAN Serine-threonine kinase receptor-associated protein OS=Homo sapiens GN=STRAP PE=1 SV=1	Q9Y3F4	38 kDa	2	1	1.5	0	1	0.5		2.1566	0.9441	1.55035	0	0.72719	0.363595	0.234524	0.235206
LYAR_HUMAN Cell growth-regulating nucleolar protein OS=Homo sapiens GN=LYAR PE=1 SV=2	Q9NX58	44 kDa	0	0	0	2	2	2		0	0	0	1.97725	1.4544	1.71583	#DIV/0!	0.0224356
TMLH_HUMAN Isoform 8 of Trimethyllysine dioxygenase, mitochondrial OS=Homo sapiens GN=TMLHE	Q9NVH6-8	51 kDa	1	2	1.5	1	0	0.5		1.0783	1.8882	1.48325	0.87465	0	0.437325	0.294842	0.221372
SH3G1_HUMAN Endophilin-A2 OS=Homo sapiens GN=SH3GL1 PE=1 SV=1	Q99961	41 kDa	0	0	0	1	3	2		0	0	0	0.87465	1.8853	1.37997	#DIV/0!	0.112008
J3QLS3_HUMAN 28S ribosomal protein S7, mitochondrial OS=Homo sapiens GN=MRPS7 PE=2 SV=1	J3QLS3	32 kDa	0	2	1	1	1	1		0	3.1538	1.5769	1.1026	0.79846	0.95053	0.602784	0.730748
ALDR_HUMAN Aldose reductase OS=Homo sapiens GN=AKR1B1 PE=1 SV=3	P15121	36 kDa	0	0	0	1	3	2		0	0	0	0.87465	1.58899	1.23182	#DIV/0!	0.0747661
STAU1_HUMAN Isoform 3 of Double-stranded RNA-binding protein Staufen homolog 1 OS=Homo sapiens GN=STAU1	O95793-3	56 kDa	2	0	1	1	1	1		2.933	0	1.4665	1.1026	0.79846	0.95053	0.648162	0.759786
NEUL_HUMAN Neurolysin, mitochondrial OS=Homo sapiens GN=NLN PE=1 SV=1	Q9BYT8	81 kDa	1	2	1.5	1	0	0.5		0.9204	1.4472	1.1838	0.61446	0	0.30723	0.259529	0.162667
RUVB1_HUMAN RuvB-like 1 OS=Homo sapiens GN=RUVBL1 PE=1 SV=1	Q9Y265	50 kDa	0	2	1	1	1	1		0	1.4472	0.7236	0.61446	0.4309	0.52268	0.722333	0.808813
LGMN_HUMAN Legumain OS=Homo sapiens GN=LGMN PE=1 SV=1	Q99538	49 kDa	1	3	2	0	0	0		0.9204	2.3913	1.65585	0	0	0	0	0.153194
LIS1_HUMAN Platelet-activating factor acetylhydrolase IB subunit alpha OS=Homo sapiens GN=PAFAH1B1 PE=1 SV=2	P43034	47 kDa	1	2	1.5	0	1	0.5		1.0783	1.8882	1.48325	0	0.72719	0.363595	0.245134	0.175922
GCSP_HUMAN Glycine dehydrogenase (decarboxylating), mitochondrial OS=Homo sapiens GN=GLDC PE=1 SV=2	P23378	113 kDa	2	0	1	1	1	1		2.6423	0	1.32115	0.89239	0.62671	0.75955	0.574916	0.713468
I1E4Y6_HUMAN PERQ amino acid-rich with GYF domain-containing protein 2 OS=Homo sapiens GN=GIGYF2 PE=2 SV=1	I1E4Y6 (+3)	153 kDa	0	0	0	1	3	2		0	0	0	0.61446	1.48851	1.05149	#DIV/0!	0.137896
BAG3_HUMAN BAG family molecular chaperone regulator 3 OS=Homo sapiens GN=BAG3 PE=1 SV=3	O95817	62 kDa	1	0	0.5	2	1	1.5		0.9204	0	0.4602	1.2289	0.4309	0.8299	1.80335	0.605595
PSA5_HUMAN Proteasome subunit alpha type-5 OS=Homo sapiens GN=PSMA5 PE=1 SV=3	P28066	26 kDa	0	0	0	2	2	2		0	0	0	2.2053	1.5969	1.9011	#DIV/0!	0.0246609
PSB6_HUMAN Proteasome subunit beta type-6 OS=Homo sapiens GN=PSMB6 PE=1 SV=4	P28072	25 kDa	0	0	0	2	2	2		0	0	0	2.2053	1.5969	1.9011	#DIV/0!	0.0246609
H0YL69_HUMAN Proteasome subunit alpha type (Fragment) OS=Homo sapiens GN=PSMA4 PE=2 SV=1	H0YL69 (+2)	26 kDa	0	0	0	2	2	2		0	0	0	2.2053	1.5969	1.9011	#DIV/0!	0.0246609
ETFB_HUMAN Electron transfer flavoprotein subunit beta OS=Homo sapiens GN=ETFB PE=1 SV=3	P38117 (+1)	28 kDa	0	0	0	2	2	2		0	0	0	2.2053	1.5969	1.9011	#DIV/0!	0.0246609
EXOS7_HUMAN Exosome complex component RRP42 OS=Homo sapiens GN=EXOSC7 PE=1 SV=3	Q15024	32 kDa	0	0	0	2	2	2		0	0	0	1.7493	1.4544	1.60185	#DIV/0!	0.00836698
LGUL_HUMAN Lactoylglutathione lyase OS=Homo sapiens GN=GLO1 PE=1 SV=4	Q04760 (+1)	21 kDa	0	0	0	2	2	2		0	0	0	2.2053	1.5969	1.9011	#DIV/0!	0.0246609
D6RIY6_HUMAN Exosome complex component RRP45 OS=Homo sapiens GN=EXOSC9 PE=2 SV=1	D6RIY6	47 kDa	0	0	0	3	1	2		0	0	0	1.8434	0.4309	1.13715	#DIV/0!	0.248663
K2C75_HUMAN Keratin, type II cytoskeletal 75 OS=Homo sapiens GN=KRT75 PE=1 SV=2	O95678	60 kDa	3	1	2	0	0	0		8.799	3.618	6.2085	0	0	0	0	0.138761
SCRN1_HUMAN Isoform 2 of Secernin-1 OS=Homo sapiens GN=SCRN1	Q12765-2	49 kDa	0	0	0	3	1	2		0	0	0	1.8434	0.4309	1.13715	#DIV/0!	0.248663
KRT83_HUMAN Keratin, type II cuticular Hb3 OS=Homo sapiens GN=KRT83 PE=1 SV=2	P78385	54 kDa	4	0	2	0	0	0		8.799	0	4.3995	0	0	0	0	0.42265
THIO_HUMAN Thioredoxin OS=Homo sapiens GN=TXN PE=1 SV=3	P10599 (+1)	12 kDa	0	0	0	1	2	1.5		0	0	0	2.2108	1.4544	1.8326	#DIV/0!	0.0400489
PSA3_HUMAN Proteasome subunit alpha type-3 OS=Homo sapiens GN=PSMA3 PE=1 SV=2	P25788 (+1)	28 kDa	0	0	0	1	2	1.5		0	0	0	1.1026	1.5969	1.34975	#DIV/0!	0.0319313
DNJC9_HUMAN DnaJ homolog subfamily C member 9 OS=Homo sapiens GN=DNAJC9 PE=1 SV=1	Q8WXX5	30 kDa	0	1	0.5	0	2	1		0	0.9441	0.47205	0	1.4544	0.7272	1.54051	0.796265
ARPC2_HUMAN Actin-related protein 2/3 complex subunit 2 OS=Homo sapiens GN=ARPC2 PE=1 SV=1	O15144	34 kDa	0	0	0	2	1	1.5		0	0	0	1.7493	0.72719	1.23825	#DIV/0!	0.136352
RFA1_HUMAN Replication protein A 70 kDa DNA-binding subunit OS=Homo sapiens GN=RPA1 PE=1 SV=2	P27694	68 kDa	0	0	0	0	3	1.5		0	0	0	0	1.58899	0.794495	#DIV/0!	0.42265
PAPS1_HUMAN Bifunctional 3'-phosphoadenosine 5'-phosphosulfate synthase 1 OS=Homo sapiens GN=PAPSS1 PE=1 SV=2	O43252	71 kDa	1	2	1.5	0	0	0		0.9204	1.4472	1.1838	0	0	0	0	0.0461106
NEMO_HUMAN Isoform 2 of NF-kappa-B essential modulator OS=Homo sapiens GN=IKBKG	Q9Y6K9-2	56 kDa	0	0	0	1	2	1.5		0	0	0	0.61446	0.8618	0.73813	#DIV/0!	0.026942
SMCE1_HUMAN Isoform 2 of SWI/SNF-related matrix-associated actin-dependent regulator of chromatin subfamily E member 1 OS=Homo sapiens GN=SMARCE1	Q969G3-2	42 kDa	0	1	0.5	0	2	1		0	0.7236	0.3618	0	0.8618	0.4309	1.19099	0.913484
H7C333_HUMAN Protein NipSnap homolog 2 (Fragment) OS=Homo sapiens GN=GBAS PE=4 SV=1	H7C333	14 kDa	1	0	0.5	0	2	1		1.4665	0	0.73325	0	1.5969	0.79845	1.08892	0.95751
SFPQ_HUMAN Splicing factor, proline- and glutamine-rich OS=Homo sapiens GN=SFPQ PE=1 SV=2	P23246	76 kDa	0	2	1	0	1	0.5		0	1.4472	0.7236	0	0.4309	0.21545	0.297747	0.570266
WDR43_HUMAN WD repeat-containing protein 43 OS=Homo sapiens GN=WDR43 PE=1 SV=3	Q15061	75 kDa	0	0	0	2	1	1.5		0	0	0	1.2289	0.4309	0.8299	#DIV/0!	0.173045
NUCL_HUMAN Nucleolin OS=Homo sapiens GN=NCL PE=1 SV=3	P19338	77 kDa	0	0	0	0	3	1.5		0	0	0	0	2.0278	1.0139	#DIV/0!	0.42265
J3KN82_HUMAN Methylthioribulose-1-phosphate dehydratase OS=Homo sapiens GN=APIP PE=2 SV=1	J3KN82	29 kDa	0	0	0	1	2	1.5		0	0	0	1.1026	1.5969	1.34975	#DIV/0!	0.0319313
GOGA2_HUMAN Golgin subfamily A member 2 OS=Homo sapiens GN=GOLGA2 PE=1 SV=3	Q08379	113 kDa	0	0	0	2	1	1.5		0	0	0	1.7848	0.62671	1.20575	#DIV/0!	0.172748
RS25_HUMAN 40S ribosomal protein S25 OS=Homo sapiens GN=RPS25 PE=1 SV=1	P62851	14 kDa	1	0	0.5	0	2	1		3.0552	0	1.5276	0	5.028	2.514	1.64572	0.769294
PSA1_HUMAN Proteasome subunit alpha type-1 OS=Homo sapiens GN=PSMA1 PE=1 SV=1	P25786 (+1)	30 kDa	0	0	0	2	1	1.5		0	0	0	2.2053	0.79846	1.50188	#DIV/0!	0.166296
INO1_HUMAN Isoform 3 of Inositol-3-phosphate synthase 1 OS=Homo sapiens GN=ISYNA1	Q9NPH2-3	55 kDa	0	0	0	1	2	1.5		0	0	0	0.61446	0.8618	0.73813	#DIV/0!	0.026942
G3V3A4_HUMAN SNW domain-containing protein 1 OS=Homo sapiens GN=SNW1 PE=2 SV=1	G3V3A4	65 kDa	0	0	0	1	2	1.5		0	0	0	0.61446	0.8618	0.73813	#DIV/0!	0.026942
DHRS2_HUMAN Dehydrogenase/reductase SDR family member 2, mitochondrial OS=Homo sapiens GN=DHRS2 PE=1 SV=4	Q13268	30 kDa	0	0	0	1	2	1.5		0	0	0	1.1026	1.5969	1.34975	#DIV/0!	0.0319313
CCDC6_HUMAN Coiled-coil domain-containing protein 6 OS=Homo sapiens GN=CCDC6 PE=1 SV=2	Q16204	53 kDa	0	0	0	2	1	1.5		0	0	0	1.2289	0.4309	0.8299	#DIV/0!	0.173045
SF3B1_HUMAN Splicing factor 3B subunit 1 OS=Homo sapiens GN=SF3B1 PE=1 SV=3	O75533	146 kDa	0	0	0	1	2	1.5		0	0	0	0.61446	0.8618	0.73813	#DIV/0!	0.026942
XRCC6_HUMAN X-ray repair cross-complementing protein 6 OS=Homo sapiens GN=XRCC6 PE=1 SV=2	P12956	70 kDa	0	2	1	0	1	0.5		0	1.4472	0.7236	0	0.4309	0.21545	0.297747	0.570266
MOES_HUMAN Moesin OS=Homo sapiens GN=MSN PE=1 SV=3	P26038	68 kDa	0	0	0	0	3	1.5		0	0	0	0	4.4262	2.2131	#DIV/0!	0.42265
SYWC_HUMAN Tryptophan--tRNA ligase, cytoplasmic OS=Homo sapiens GN=WARS PE=1 SV=2	P23381	53 kDa	0	0	0	2	1	1.5		0	0	0	1.2289	0.4309	0.8299	#DIV/0!	0.173045
CAZA2_HUMAN F-actin-capping protein subunit alpha-2 OS=Homo sapiens GN=CAPZA2 PE=1 SV=3	P47755	33 kDa	0	0	0	0	2	1		0	0	0	0	1.4544	0.7272	#DIV/0!	0.42265
H0YDB2_HUMAN Stromal interaction molecule 1 (Fragment) OS=Homo sapiens GN=STIM1 PE=4 SV=1	H0YDB2	45 kDa	0	2	1	0	0	0		0	1.4472	0.7236	0	0	0	0	0.42265
ODO2_HUMAN Dihydrolipoyllysine-residue succinyltransferase component of 2-oxoglutarate dehydrogenase complex, mitochondrial OS=Homo sapiens GN=DLST PE=1 SV=4	P36957	49 kDa	0	0	0	0	2	1		0	0	0	0	0.8618	0.4309	#DIV/0!	0.42265
K1H1_HUMAN Keratin, type I cuticular Ha1 OS=Homo sapiens GN=KRT31 PE=2 SV=3	Q15323	47 kDa	2	0	1	0	0	0		2.933	0	1.4665	0	0	0	0	0.42265
A6NE09_HUMAN 40S ribosomal protein SA OS=Homo sapiens GN=RPSAP58 PE=2 SV=1	A6NE09 (+2)	33 kDa	0	0	0	0	2	1		0	0	0	0	1.4544	0.7272	#DIV/0!	0.42265
NNRE_HUMAN NAD(P)H-hydrate epimerase OS=Homo sapiens GN=APOA1BP PE=1 SV=2	Q8NCW5 (+1)	32 kDa	0	0	0	2	0	1		0	0	0	2.2053	0	1.10265	#DIV/0!	0.42265
SUGT1_HUMAN Suppressor of G2 allele of SKP1 homolog OS=Homo sapiens GN=SUGT1 PE=1 SV=3	Q9Y2Z0 (+1)	41 kDa	0	0	0	0	2	1		0	0	0	0	0.8618	0.4309	#DIV/0!	0.42265
B7Z6A8_HUMAN Mycophenolic acid acyl-glucuronide esterase, mitochondrial OS=Homo sapiens GN=ABHD10 PE=2 SV=1	B7Z6A8	17 kDa	0	0	0	0	2	1		0	0	0	0	1.5969	0.79845	#DIV/0!	0.42265
EF1B_HUMAN Elongation factor 1-beta OS=Homo sapiens GN=EEF1B2 PE=1 SV=3	P24534	25 kDa	0	0	0	0	2	1		0	0	0	0	1.5969	0.79845	#DIV/0!	0.42265
PSME1_HUMAN Proteasome activator complex subunit 1 OS=Homo sapiens GN=PSME1 PE=1 SV=1	Q06323	29 kDa	0	0	0	0	2	1		0	0	0	0	1.4544	0.7272	#DIV/0!	0.42265
AL7A1_HUMAN Isoform 4 of Alpha-aminoadipic semialdehyde dehydrogenase OS=Homo sapiens GN=ALDH7A1	P49419-4	54 kDa	0	0	0	2	0	1		0	0	0	1.2289	0	0.61445	#DIV/0!	0.42265
EOGT_HUMAN EGF domain-specific O-linked N-acetylglucosamine transferase OS=Homo sapiens GN=EOGT PE=1 SV=1	Q5NDL2	62 kDa	0	2	1	0	0	0		0	1.4472	0.7236	0	0	0	0	0.42265
DEK_HUMAN Protein DEK OS=Homo sapiens GN=DEK PE=1 SV=1	P35659	43 kDa	0	0	0	0	2	1		0	0	0	0	0.8618	0.4309	#DIV/0!	0.42265
HNRPR_HUMAN Heterogeneous nuclear ribonucleoprotein R OS=Homo sapiens GN=HNRNPR PE=1 SV=1	O43390 (+2)	71 kDa	0	0	0	2	0	1		0	0	0	1.2289	0	0.61445	#DIV/0!	0.42265
TR61B_HUMAN tRNA (adenine(58)-N(1))-methyltransferase, mitochondrial OS=Homo sapiens GN=TRMT61B PE=1 SV=2	Q9BVS5	53 kDa	0	2	1	0	0	0		0	1.4472	0.7236	0	0	0	0	0.42265
RS13_HUMAN 40S ribosomal protein S13 OS=Homo sapiens GN=RPS13 PE=1 SV=2	P62277	17 kDa	0	0	0	2	0	1		0	0	0	4.4216	0	2.2108	#DIV/0!	0.42265
B4E3S0_HUMAN Coronin OS=Homo sapiens GN=CORO1C PE=2 SV=1	B4E3S0 (+3)	42 kDa	0	0	0	0	2	1		0	0	0	0	0.8618	0.4309	#DIV/0!	0.42265
NDK3_HUMAN Nucleoside diphosphate kinase 3 OS=Homo sapiens GN=NME3 PE=1 SV=2	Q13232	19 kDa	0	0	0	2	0	1		0	0	0	4.4216	0	2.2108	#DIV/0!	0.42265
EXOS2_HUMAN Exosome complex component RRP4 OS=Homo sapiens GN=EXOSC2 PE=1 SV=2	Q13868	33 kDa	0	0	0	0	2	1		0	0	0	0	1.4544	0.7272	#DIV/0!	0.42265
HOOK3_HUMAN Protein Hook homolog 3 OS=Homo sapiens GN=HOOK3 PE=1 SV=2	Q86VS8	83 kDa	0	2	1	0	0	0		0	1.4472	0.7236	0	0	0	0	0.42265
